# Supplementary material
Source: PubMed Central journal article supplement (PMC3169757)

## Supplemental Figure Legends

**Supplemental Figure 1. Flow cytometric analysis of cell populations in the peritoneal cavity of CD93<sup>-/-</sup> and wildtype mice.** Peritoneal cells were stained with anti-Gr1 (A) and anti-F4/80 antibodies (B), or Annexin-V (C) and analyzed by flow cytometry. The relative percentages of positive cells were plotted relative to the wildtype. Bars represent the mean of at least three mice  $\pm$  SD.

**Supplemental Figure 2. CD93<sup>-/-</sup> mice have similar levels of CCL21 compared to wildtype mice.** CCL21 in peritoneal lavage fluid from CD93<sup>-/-</sup> (clear bars) and wildtype (black bars) mice was measured by ELISA 24 hours post injection of PBS or thioglycollate (TG). Bars represent the average of at least three mice per genotype  $\pm$  SEM for PBS injection and one to two mice for thioglycollate (TG) injection (A). CCL21 was measured in peritoneal lavage fluid 24 hours post injection of TG. Each bar represents the mean of at least three individual mice per genotype  $\pm$  SEM (B).

**Supplemental Figure 3. Thioglycollate induced peritonitis triggers complement activation in the peritoneal cavity.** C3a (A) and C5a (B) were measured in peritoneal lavage fluid from wildtype and CD93<sup>-/-</sup> mice by ELISA between 0 and 6 hours post injection of thioglycollate. Each point represents the mean of triplicate wells containing fluid from an individual mouse.

**Supplemental Figure 4. Leukocyte recruitment correlates with C1q-hemolytic activity.** C1q-hemolytic activity was plotted against cell number from individual bone marrow chimeric mice. Each point represents the value from an individual mouse and each chimeric group is represented by a different symbol: (■) for wildtype recipient mice of wildtype donor

bone marrow, (○) for CD93<sup>-/-</sup> recipients of CD93<sup>-/-</sup> donor bone marrow, (◆) for wildtype recipients of CD93<sup>-/-</sup> donor bone marrow , and (▲) for CD93<sup>-/-</sup> recipients of wildtype donor bone marrow. (\*  $p < 0.05$ , one-tailed Pearson's correlation test).

# Supplemental Figure 1

A

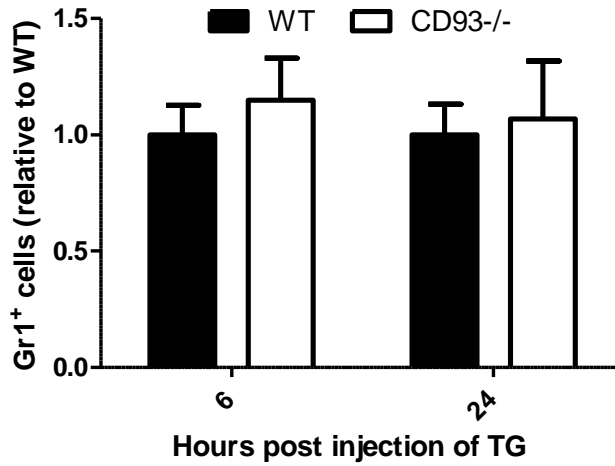

B

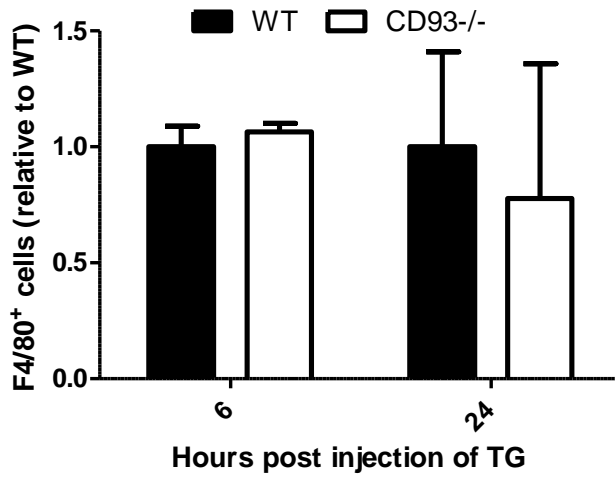

C

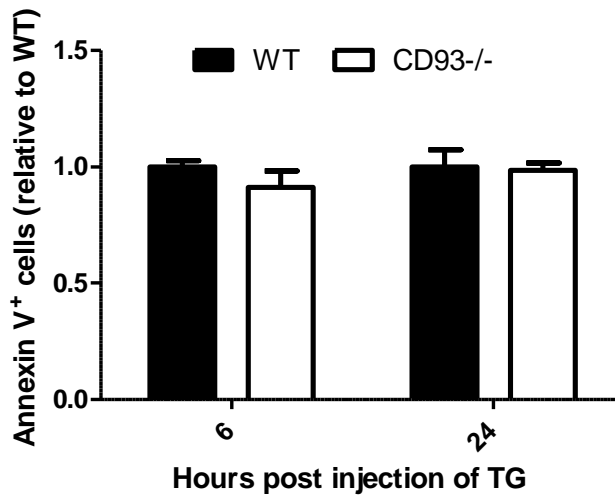

## Supplemental Figure 2

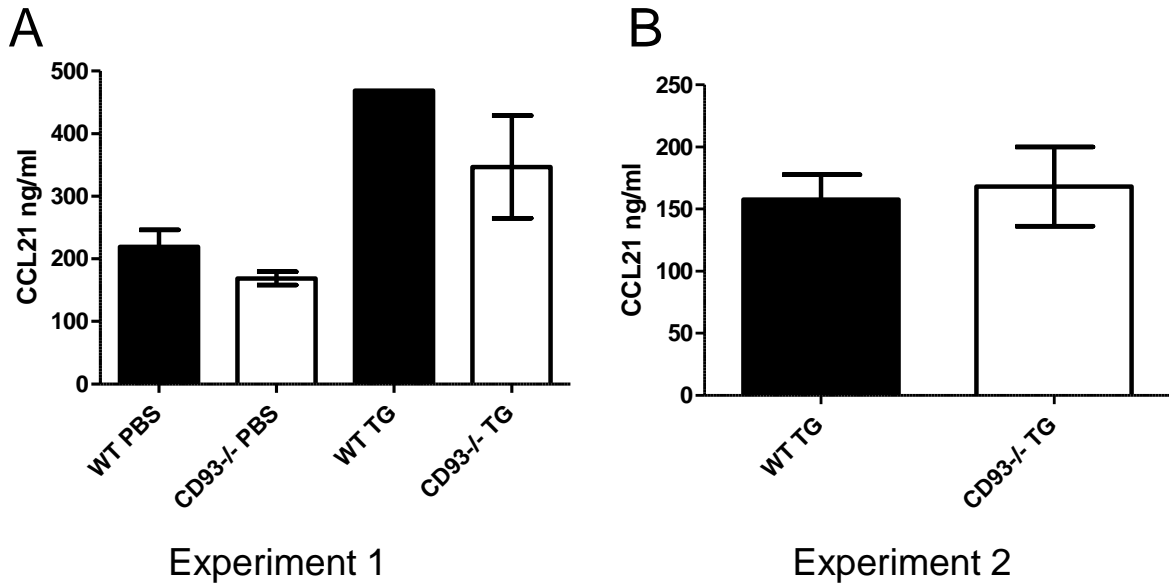

# Supplemental Figure 3

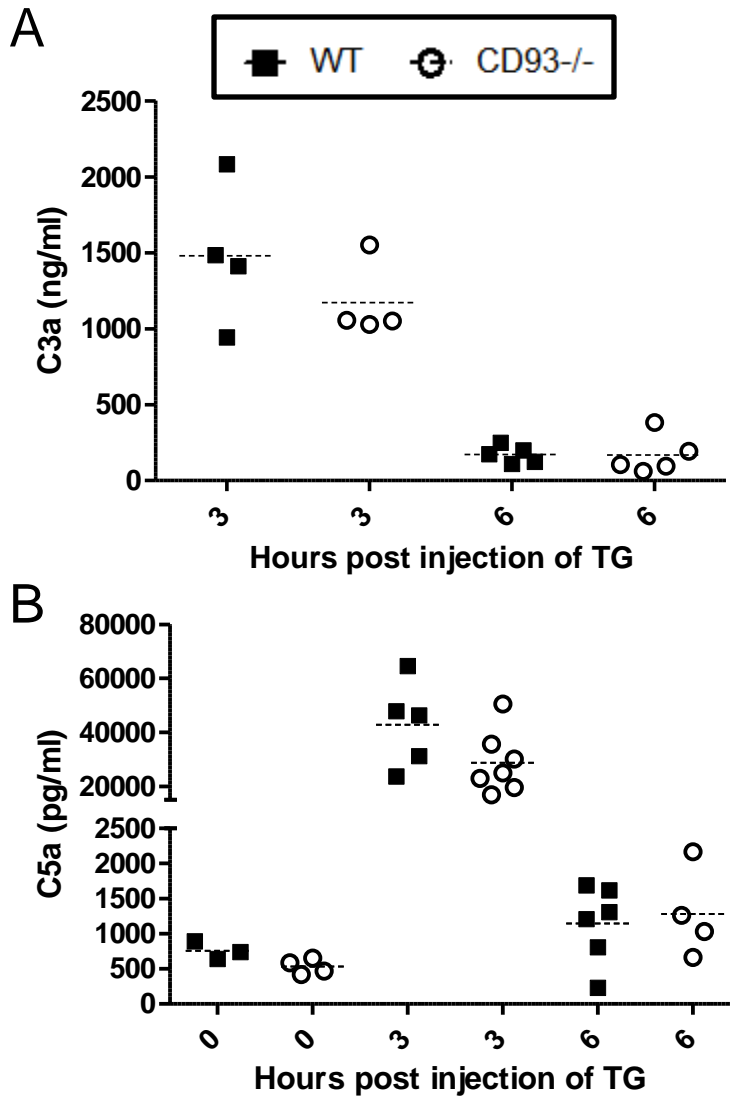

Supplemental Figure 4

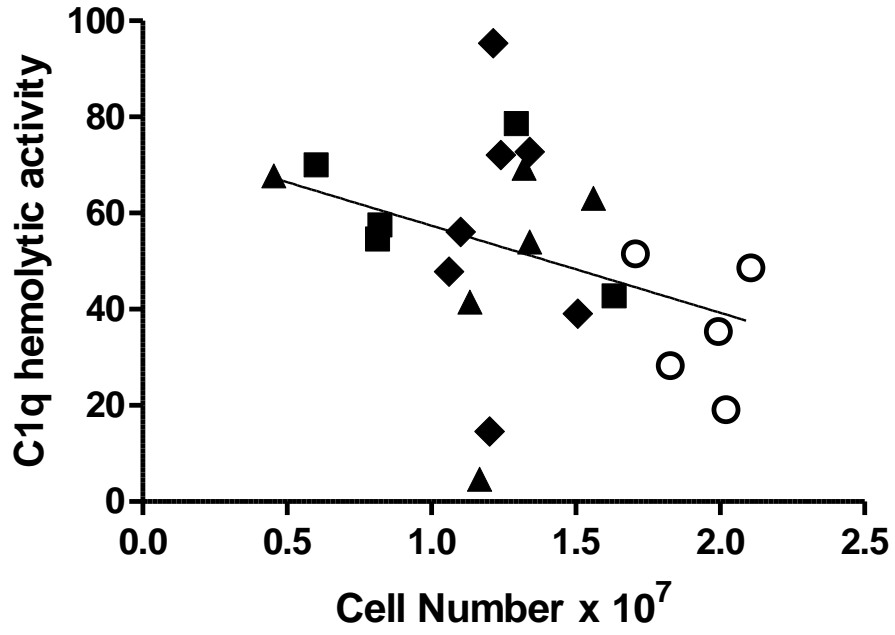

Supplement: NIHMS312526-supplement-1.pdf [file NIHMS312526-supplement-1.pdf]
